# Supplementary material
Source: PubMed Central journal article supplement (PMC2048733)
Supplement: plntphys_pp.107.103226_3.pdf [file plntphys_pp.107.103226_3.pdf]

## Supplemental Figure

Illustration of the algorithm used for finding the midline of the root. (A) Flow chart of the iterative algorithm showing all steps involved in identification of the root midline. (B) An example image showing identification of the root midline. White empty circles on the root show the points that were tracked. The axially oriented long black line shows the smooth fitted curve to the tracked points. Black empty circles show the root edge points. The axially oriented long white line with filled white circles show the root midline, and radially oriented short black lines joining the edge points show lines perpendicular to the root midline.
